# Supplementary material for: Perivascular localization of macrophages in the intestinal mucosa is regulated by Nr4a1 and the microbiome
Source: PubMed Central journal article supplement (PMC7067862; doi:10.1038/s41467-020-15068-4), 2020-03-12
Supplement: 41467_2020_15068_MOESM1_ESM.pdf [file 41467_2020_15068_MOESM1_ESM.pdf]

**Perivascular Localization of Macrophages in the Intestinal Mucosa is Regulated by  
Nr4a1 and the Microbiome**

Honda et al.

**Supplementary Information**

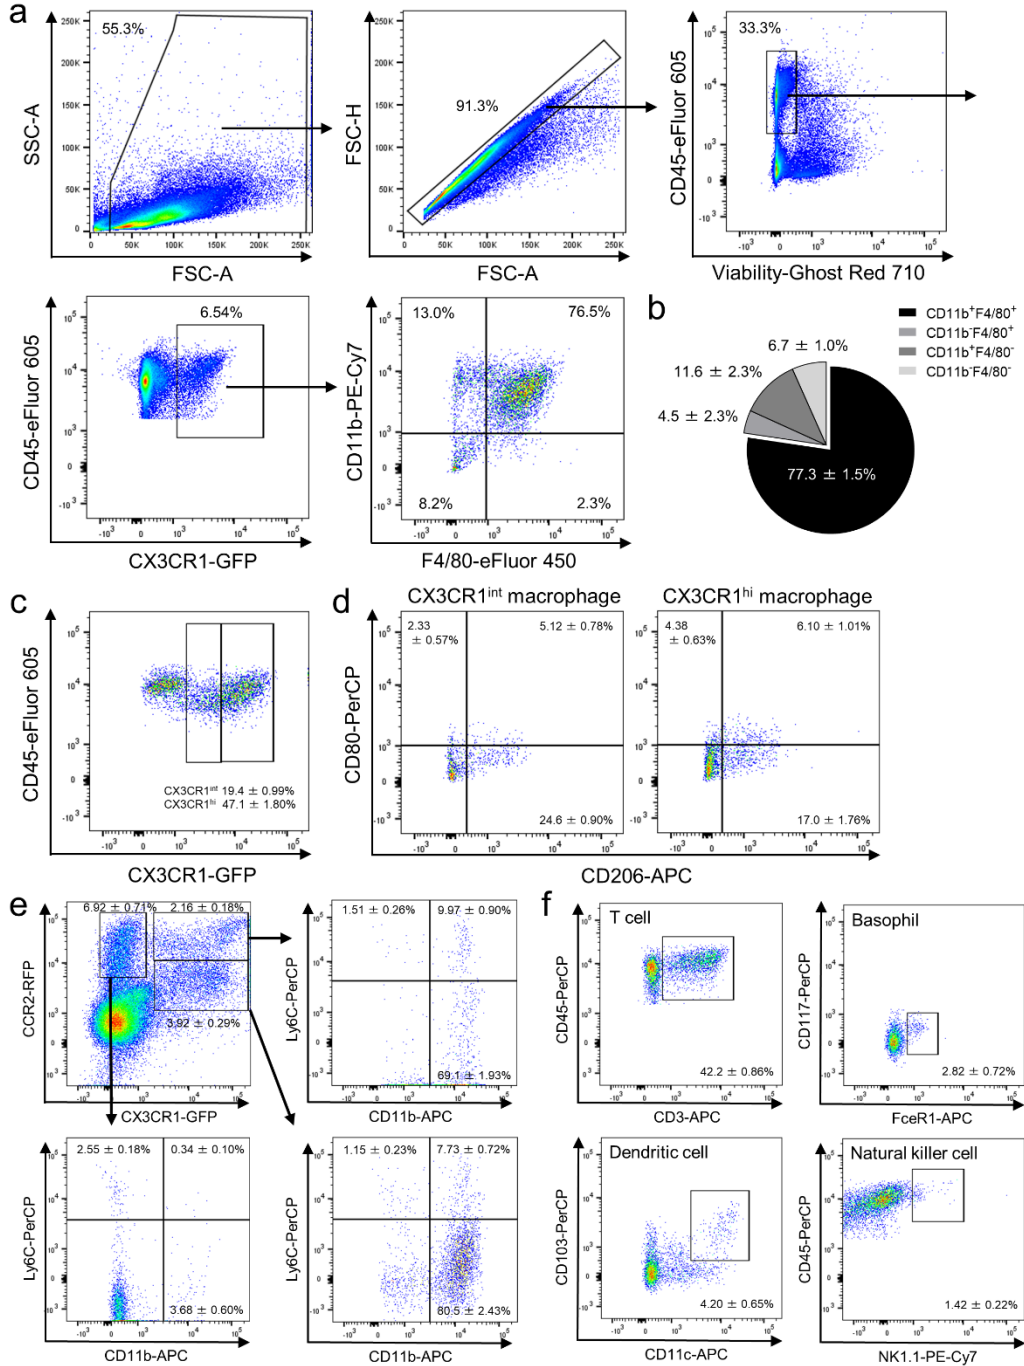

**Supplementary Figure 1. Phenotype of CX3CR1<sup>+</sup> and CCR2<sup>+</sup> cell populations in lamina propria of the colon under steady state.** (a) Flow cytometry sorting strategy for colonic lamina propria (LP) resident CX3CR1<sup>+</sup> cells. Results are representative of 2 independent experiments. (b) Quantification in proportion of CD11b<sup>+</sup>F4/80<sup>+</sup> cells per CX3CR1<sup>+</sup> cells. Cells were pregated on size, viability, and CD45<sup>+</sup>. n = 5. (c) Quantification in proportion of colonic LP CX3CR1<sup>int</sup> and CX3CR1<sup>hi</sup> macrophages at steady state. Cells were pregated on size, viability, CD45<sup>+</sup>, CD103<sup>-</sup>, CD11b<sup>+</sup> and F4/80<sup>+</sup>. n = 8. (d) Macrophage phenotype (CD80<sup>+</sup>CD206<sup>-</sup> or CD80<sup>-</sup>CD206<sup>+</sup>) in CX3CR1<sup>int</sup> and CX3CR1<sup>hi</sup> macrophages at steady state. Cells were pregated on size, viability, CD45<sup>+</sup>, CD103<sup>-</sup>, CD11b<sup>+</sup>, F4/80<sup>+</sup> and CX3CR1<sup>int/hi</sup>. n = 4. (e) Flow cytometry analysis of CD11b and Ly6C positivity in CX3CR1<sup>+</sup>CCR2<sup>+</sup>, CX3CR1<sup>+</sup>CCR2<sup>hi</sup>, and CX3CR1<sup>+</sup>CCR2<sup>lo</sup> cell population obtained from colonic LP under steady state. Cells were pregated on size, viability, and CD45<sup>+</sup>. n = 8. (f) Phenotype of CD45<sup>+</sup>CX3CR1<sup>+</sup>CCR2<sup>+</sup> cells in colonic LP. n = 5. Data represent mean ± SEM. Source data are provided as a Source Data file.

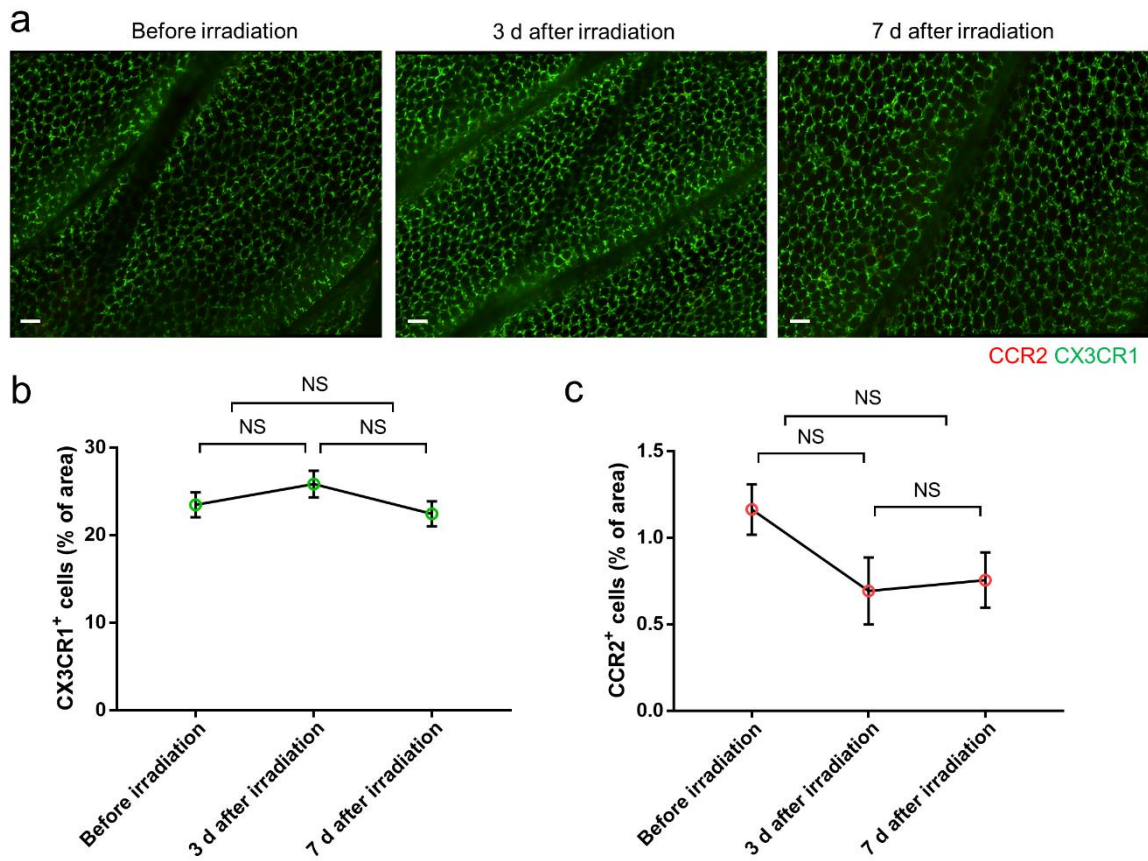

**Supplementary Figure 2. Irradiation does not affect the resident population of intestinal CX3CR1<sup>+</sup> macrophages.** (a) Representative stitch images of colonic LP in *Cx3cr1<sup>GFP/+</sup>Ccr2<sup>RFP/+</sup>* mice before irradiation and at 3 or 7 days after irradiation. Quantification of (b) CX3CR1<sup>+</sup> cells and (c) CCR2<sup>+</sup> cells (% of area). n = 3-6 at each time point. Data represent mean ± SEM. NS, not significant. Source data are provided as a Source Data file.

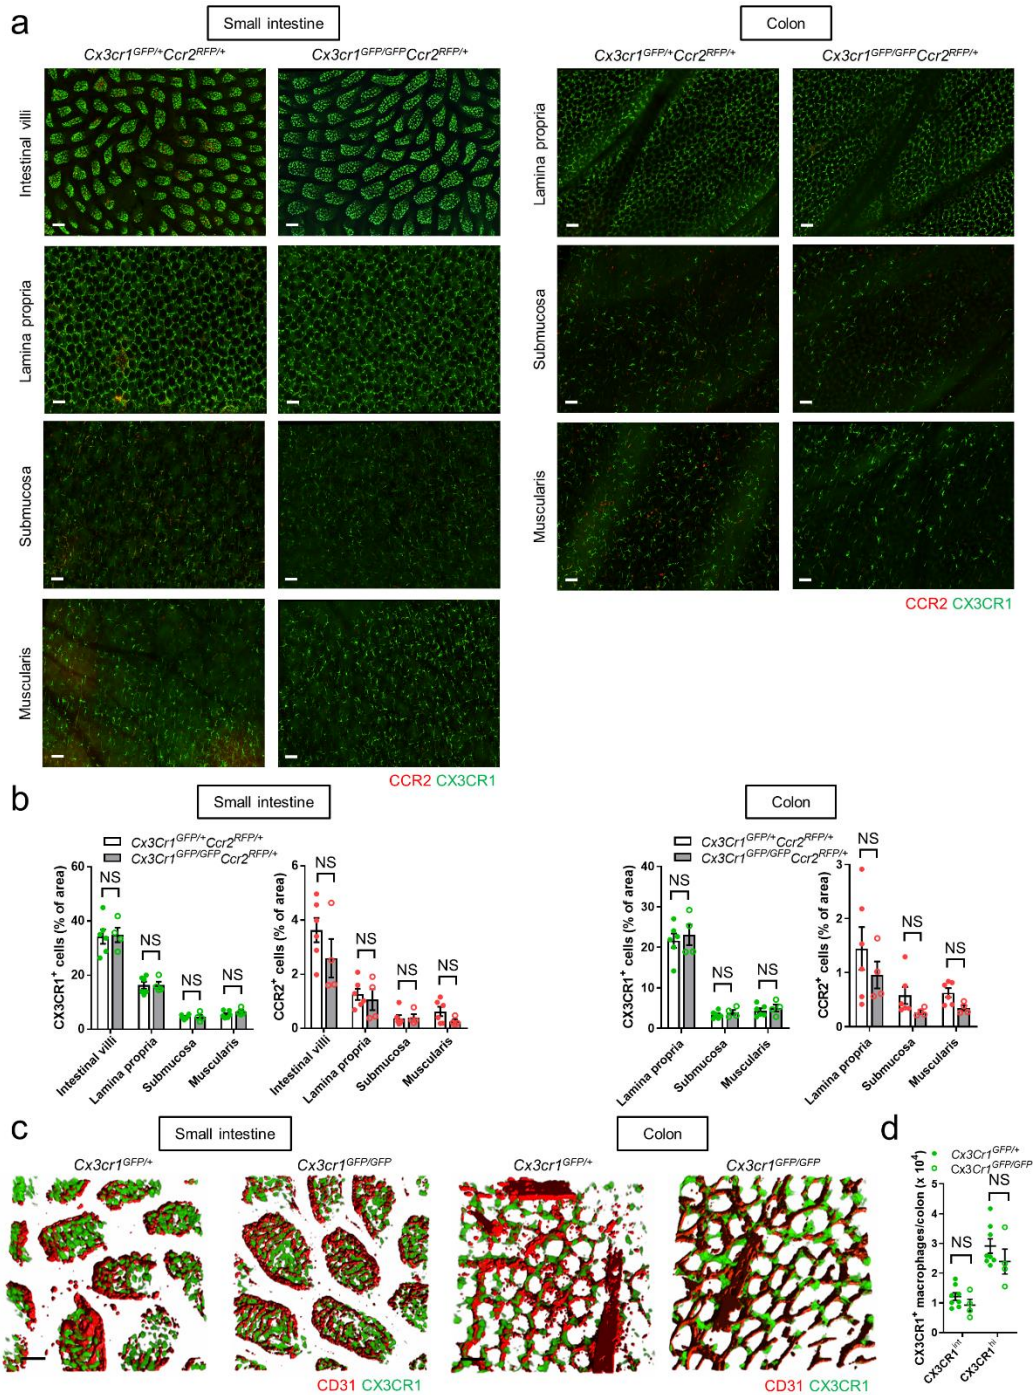

**Supplementary Figure 3. CX3CR1 deficiency does not affect the distribution and morphology of intestinal CX3CR1<sup>+</sup> macrophages.** (a) Representative stitch images (from 12 different field of view) of small intestinal villi, lamina propria, submucosa and muscularis in *Cx3cr1<sup>GFP/+</sup>Ccr2<sup>RFP/+</sup>* and *Cx3cr1<sup>GFP/GFP</sup>Ccr2<sup>RFP/+</sup>* (CX3CR1 deficient) mice. Scale bars, 100  $\mu$ m. (b) Quantification of CX3CR1<sup>+</sup> cells or CCR2<sup>+</sup> cells per field of view in each layer of the intestine in *Cx3cr1<sup>GFP/+</sup>Ccr2<sup>RFP/+</sup>* and *Cx3cr1<sup>GFP/GFP</sup>Ccr2<sup>RFP/+</sup>* mice. The area where the intestinal tissue does not exist was excluded from the calculation. n = 4-6 per group. (c) Representative 3D reconstructed images of CX3CR1<sup>+</sup> macrophages in small intestinal villi and colonic lamina propria. (d) Quantification of the number of CX3CR1<sup>int</sup> and CX3CR1<sup>hi</sup> macrophages by flow cytometry in *Cx3cr1<sup>GFP/+</sup>* and *Cx3cr1<sup>GFP/GFP</sup>* mice. Cells were gated on size, viability, CD45<sup>+</sup>, CD103<sup>+</sup>, CD11b<sup>+</sup>, F4/80<sup>+</sup> and CX3CR1<sup>int/hi</sup>. n = 4-8 per group. Data represent mean  $\pm$  SEM. NS, not significant. Source data are provided as a Source Data file.

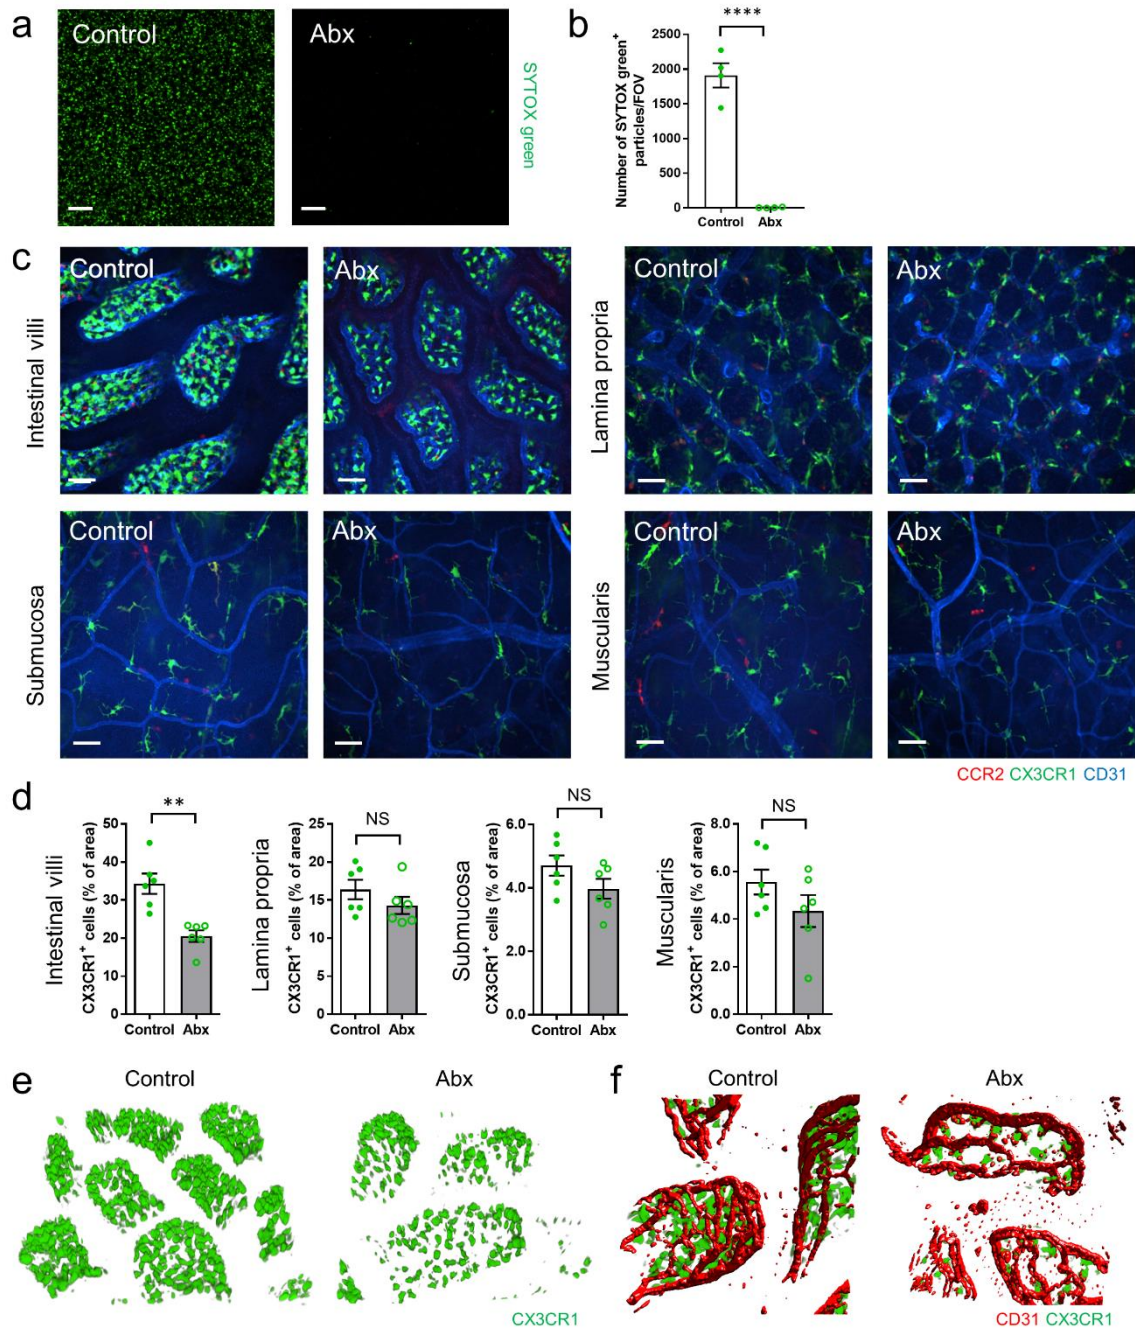

**Supplementary Figure 4. Gut microbiota affects the distribution of small intestinal CX3CR1<sup>+</sup> macrophages.** (a) Representative images of SYTOX green<sup>+</sup> particles in intestinal contents of SPF control and Abx-treated mice. Scale bars, 50  $\mu$ m. (b) Quantification of the number of SYTOX green<sup>+</sup> particle per field of view.  $n = 4$  per group. (c) Representative images of small intestinal villi, lamina propria, submucosa and muscularis in *Cx3cr1<sup>GFP/+</sup>Ccr2<sup>RFP/+</sup>* mice (The left column is SPF control, the right column is Abx-treated mice). Scale bars, 50  $\mu$ m. (d) Quantification of CX3CR1<sup>+</sup> cells per field of view in each layer of the small intestine in control and Abx-treated mice. The area where the intestinal tissue does not exist was excluded from the calculation.  $n = 6$  per group. (e), (f) Representative 3D reconstructed images of CX3CR1<sup>+</sup> macrophages in small intestinal villi in control and Abx-treated mice. Data are representative of five independent experiments. Data represent mean  $\pm$  SEM. \* $p < 0.05$ , \*\* $p < 0.01$ , \*\*\*\* $p < 0.0001$ , NS, not significant. Source data are provided as a Source Data file.

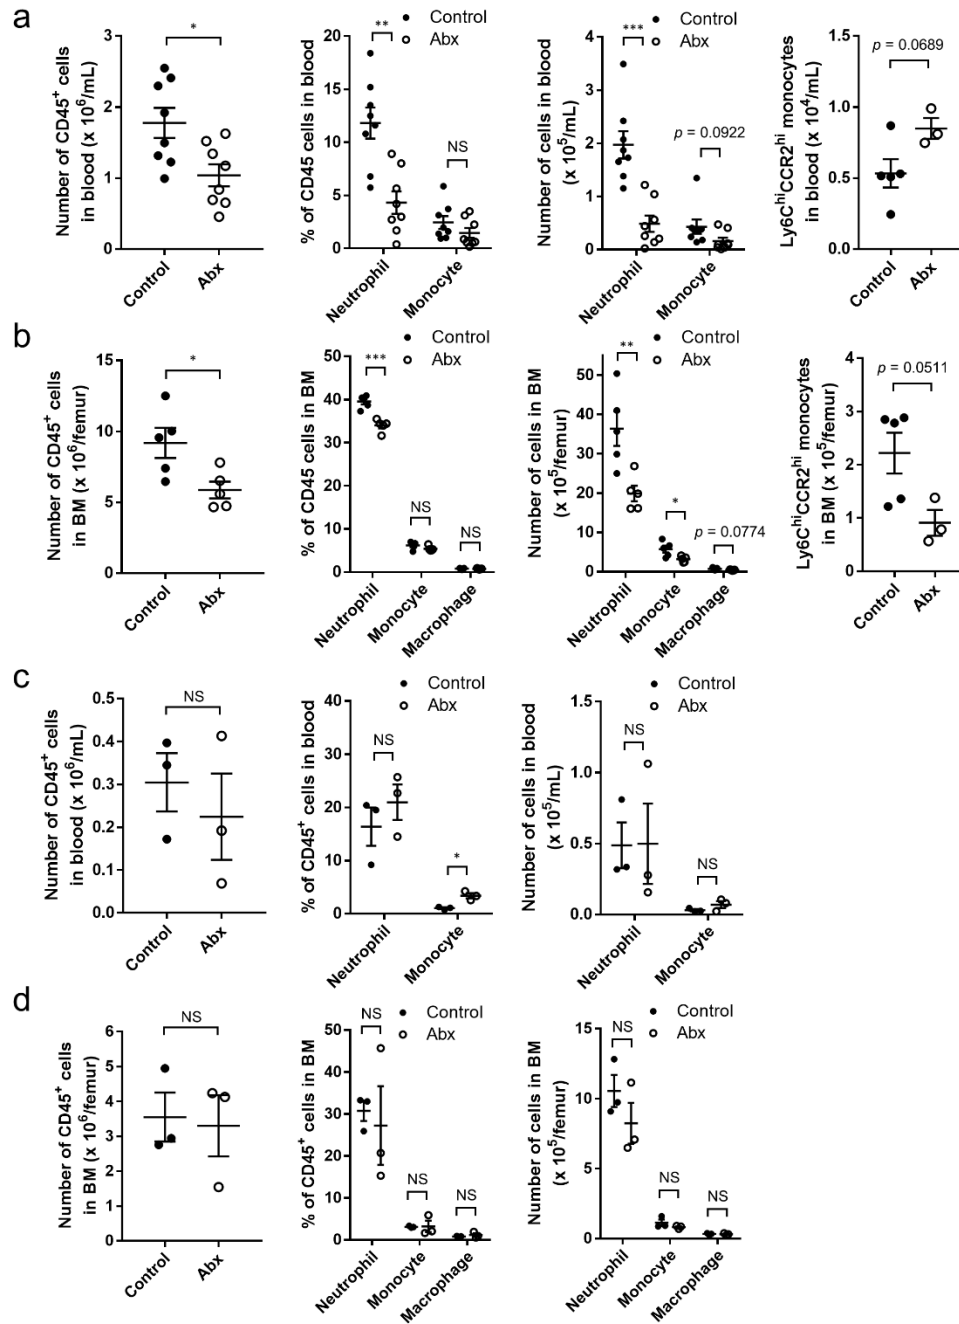

**Supplementary Figure 5. Gut microbiota affects homeostasis of innate immune cells in blood and bone marrow.** (a) Total number of leukocytes and proportion/number of innate immune cell subsets (neutrophil; gated on size, viability, CD45<sup>+</sup>, CD11b<sup>+</sup>, Ly6G<sup>+</sup>, monocyte; gated on size, viability, CD45<sup>+</sup>, CD11b<sup>+</sup>, Ly6G<sup>low</sup>, Ly6C<sup>+</sup>, Ly6C<sup>hi</sup>CCR2<sup>hi</sup> monocyte; pregated on size, viability, CD45<sup>+</sup>, CD11b<sup>+</sup>) in blood of control and Abx-treated mice at steady state.  $n = 3-8$  per group. (b) Total number of leukocytes and proportion/number of innate immune cell subsets (neutrophil, monocyte, macrophage; gated on size, viability, CD45<sup>+</sup>, CD11b<sup>+</sup>, F4/80<sup>+</sup>, Ly6C<sup>hi</sup>CCR2<sup>hi</sup> monocyte) in bone marrow of control and Abx-treated mice at steady state.  $n = 3-5$  per group. (c) Total number of leukocytes and proportion/number of innate immune cell subsets (neutrophil, monocyte) in blood of control and Abx-treated mice at 2 weeks after bone marrow transplantation (BMT).  $n = 3$  per group. (d) Total number of leukocytes and proportion/number of innate immune cell subsets (neutrophil, monocyte, macrophage) in bone marrow of control and Abx-treated mice at 2 weeks after BMT.  $n = 3$  per group. Data represent mean  $\pm$  SEM. \* $p < 0.05$ , \*\* $p < 0.01$ , \*\*\* $p < 0.001$ , NS, not significant. Source data are provided as a Source Data file.

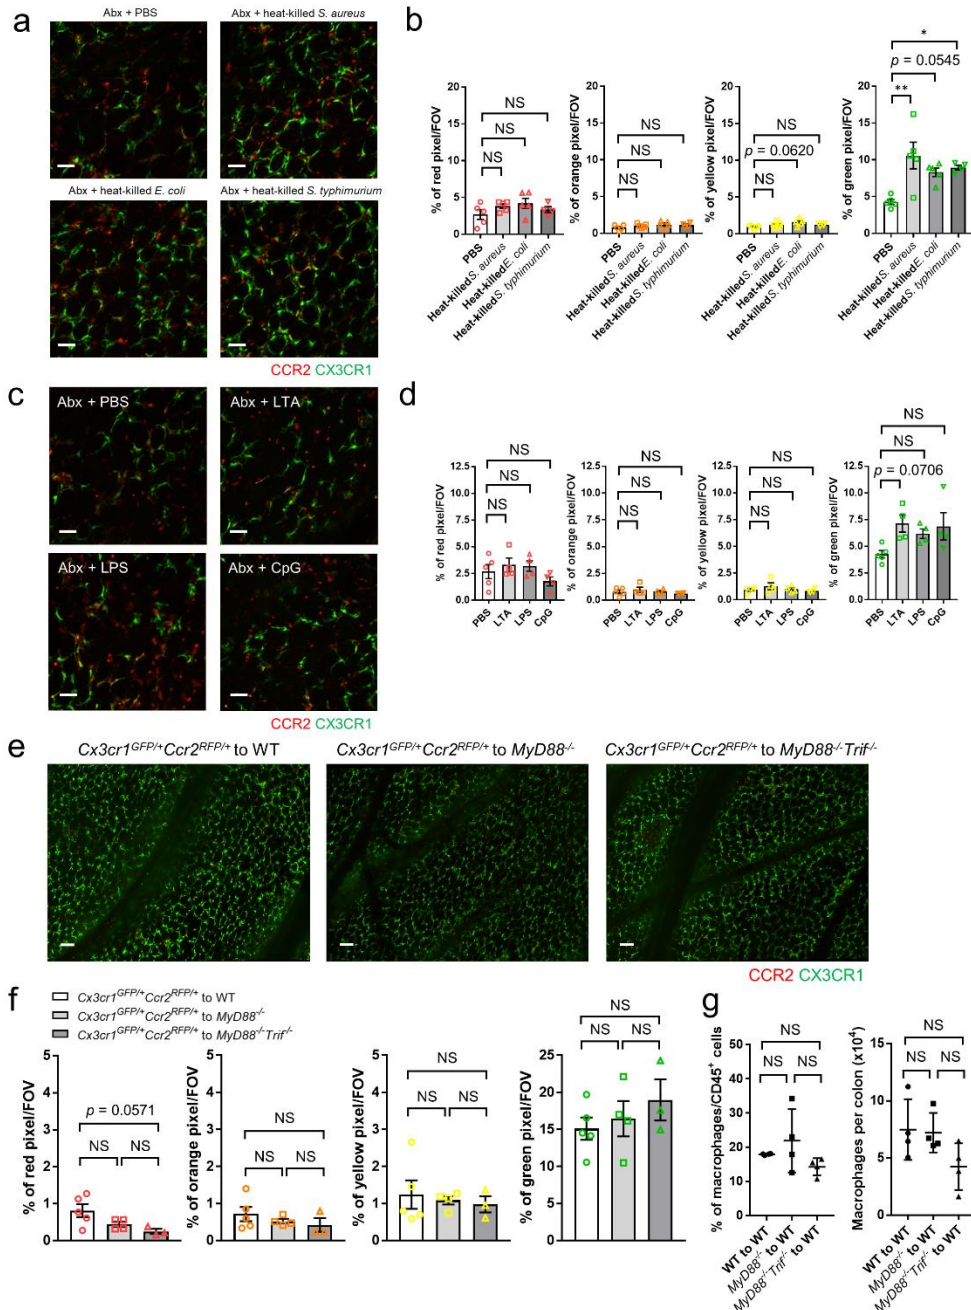

**Supplementary Figure 6. TLRs and MyD88 or MyD88/Trif signaling are not key pathways in turnover of intestinal macrophages in response to bacterial products.** (a) Representative images of colonic LP of Abx-treated mice who underwent BMT from *Cx3cr1*<sup>GFP/+</sup>*Ccr2*<sup>RFP/+</sup> mice. Mice were treated by PBS, or heat-killed bacteria including *S. aureus*, *E. coli*, or *S. typhimurium* for 6 weeks after BMT. Scale bars, 50  $\mu$ m. (b) Quantification of monocyte hues 6 weeks after BMT in each group.  $n = 4-5$  per group. (c) Representative images of colonic lamina propria in Abx-treated C57BL/6 mice at 6 weeks after BMT from *Cx3cr1*<sup>GFP/+</sup>*Ccr2*<sup>RFP/+</sup> mice. Mice were treated by oral administration of PBS, LTA, LPS, or CpG. Scale bars, 50  $\mu$ m. (d) Quantification of monocyte hues 6 weeks after BMT in each group.  $n = 4-5$  per group. (e) Representative stitch images of colonic lamina propria and (f) quantification of monocyte hues in WT, *MyD88*<sup>-/-</sup>, or *MyD88*<sup>-/-</sup>*Trif*<sup>-/-</sup> mice at 6 weeks after BMT from *Cx3cr1*<sup>GFP/+</sup>*Ccr2*<sup>RFP/+</sup> mice. Scale bars, 100  $\mu$ m.  $n = 3-5$  per group. (g) Proportion and number of intestinal macrophages in WT mice 6 weeks after BMT from WT, *MyD88*<sup>-/-</sup>, or *MyD88*<sup>-/-</sup>*Trif*<sup>-/-</sup> mice. Cells were pregated on size, viability, CD45<sup>+</sup>, CD11b<sup>+</sup>, and F4/80<sup>+</sup>.  $n = 4$  per group. Data represent mean  $\pm$  SEM. \* $p < 0.05$ , \*\* $p < 0.01$ , NS, not significant. Source data are provided as a Source Data file.





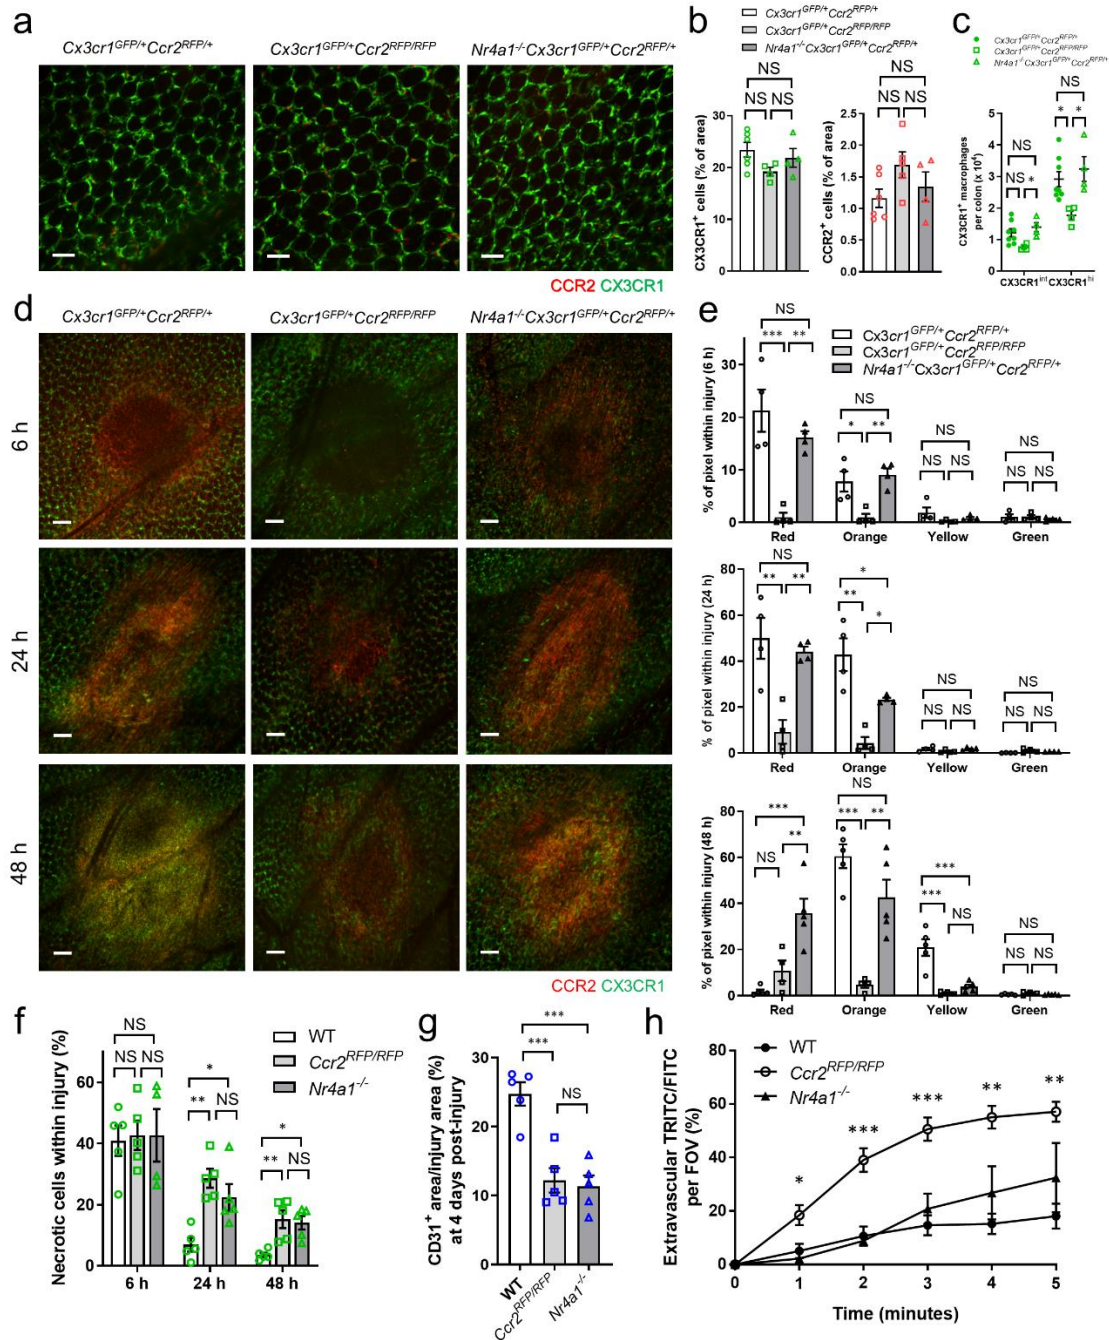

**Supplementary Figure 8. Accumulation of reparative CX3CR1<sup>+</sup> monocytes at the site of sterile injury is dependent on the CCR2 receptor and transcription factor Nr4a1.** (a) Representative images of colonic LP in *Cx3cr1<sup>GFP/+</sup>Ccr2<sup>RFP/+</sup>*, *Cx3cr1<sup>GFP/+</sup>Ccr2<sup>RFP/RFP</sup>*, and *Nr4a1<sup>-/-</sup>Cx3cr1<sup>GFP/+</sup>Ccr2<sup>RFP/+</sup>* mice. Scale bars, 50  $\mu$ m. (b) Quantification of the area in CX3CR1<sup>+</sup> cells or CCR2<sup>+</sup> cells per field of view.  $n = 4-6$  per group. (c) Quantification of the number of CX3CR1<sup>int</sup> and CX3CR1<sup>hi</sup> macrophages by flow cytometry in each group. Cells were gated on size, viability, CD45<sup>+</sup>, CD103<sup>+</sup>, CD11b<sup>+</sup>, F4/80<sup>+</sup> and CX3CR1<sup>int/hi</sup>.  $n = 4-8$  per group. (d) Representative images taken from 6 to 48 hrs after focal intestinal injury and (e) quantification of their monocyte hues within injury in *Cx3cr1<sup>GFP/+</sup>Ccr2<sup>RFP/+</sup>*, *Cx3cr1<sup>GFP/+</sup>Ccr2<sup>RFP/RFP</sup>*, and *Nr4a1<sup>-/-</sup>Cx3cr1<sup>GFP/+</sup>Ccr2<sup>RFP/+</sup>* mice. Scale bars, 100  $\mu$ m.  $n = 4-6$  per group. Quantification of (f) SYTOX green<sup>+</sup> and (g) CD31<sup>+</sup> area within injury at indicated time points.  $n = 4-5$  per group. (h) Quantification of extravascular TRITC/FITC<sup>+</sup> area/FOV.  $n = 3-5$  per group. Data represent mean  $\pm$  SEM. \* $p < 0.05$ , \*\* $p < 0.01$ , \*\*\* $p < 0.001$ , NS, not significant. Source data are provided as a Source Data file.
